# Supplementary material for: Plasma FGF21 concentrations are regulated by glucose independently of insulin and GLP-1 in lean, healthy humans
Source: PeerJ. 2022 Jan 19;10:e12755. doi: 10.7717/peerj.12755 (PMC8783558; doi:10.7717/peerj.12755)
Supplement: Supplemental Information 1 [file peerj-10-12755-s001.xlsx]

## Sheet: Hyperinsulinemic clamp
ID	Age (years)	Sex (1=M, 2=F)	Weight (kg)	BMI (kg/m2)	HbA1c (%)	HbA1c (mmol/mol)	GDR (mg/kg/min)	GDR (µmol/kg/min)	Fasting glucose (mM)	Clamp glucose (mM)	Clamp Glucose CV (%)	Fasting insulin (pM)	Clamp insulin (pM)	Fasting FGF21 (pg/mL)	Clamp FGF21 (pg/mL)
HyperInsclamp1	31	1	94.5	27.76	5.2	33.34	9.64	53.54	3.56	5.06	3.98	57.8	551.62	66.22	67.84
HyperInsclamp2	27	2	59.1	23.83	5.2	33.34	9.44	52.43	5.11	5.06	11.2	31.2	438.25	90.36	73.46
HyperInsclamp3	27	2	53.6	18.24	5.5	36.62	11.42	63.46		4.83	5.1	32.2	407.84	85.32	84.84
HyperInsclamp4	31	1	65.8	21.61	5.5	36.62	9.48	52.67	5.29	4.83	9.3	20.8	465.9	322.88	339.5
HyperInsclamp5	30	2	57.6	20.59	5.6	37.71	11.97	66.52	5.86	4.61	6.7	18.4	480.42	397.1	334.98
HyperInsclamp6	25	2	50.9	21.55	5.3	34.43	9.12	50.69	5.67	5.11	3.4	86.9	483.18	276.98	240.36
HyperInsclamp7	28	2	61.9	22.5	5.3	34.43	8.66	48.1	4.58	5.11	5.9	30.1	446.55	65.52	82.46
HyperInsclamp8	23	2	62.1	21.25	5	31.15	8.91	49.53	3.77	4.89	3.9	24.9	429.27	803.34	759.02
HyperInsclamp9	23	1	62.5	20.88	4.9	30.06	9.94	55.25	4.1	5	6.1	27.1	415.44
HyperInsclamp10	23	1	74.7	24.96	5.1	32.24	4.91	27.25	4.94	5.11	9.1	34.4	463.83	70.18	66.46

## Sheet: Hyperglycemic clamp
ID	Age (years)	Sex (1=M, 2=F)	Weight (kg)	BMI (kg/m2)	HbA1c (%)	HbA1c (mmol/mol)	Fasting glucose (mM)	Clamp glucose (mM)	Clamp Glucose CV (%)	Fasting insulin (pM)	Clamp insulin (pM)	Fasting FGF21 (pg/mL)	Clamp FGF21 (pg/mL)
HyperGclamp1	18	1	77.1	23.0729	5.2	33	5.5	6.97143	1.36441	43.6976	88.3892	307.591	479.218
HyperGclamp2	20	1	81.95	23.9963	5.3	34	5.2	9.75714	3.3398	58.6907	512.224	168.049	164.064
HyperGclamp3	18	1	57.5	19.2121	5.3	34	3.6	4.95714	1.07829	44.227	117.509	1328.45	1396.77
HyperGclamp4	28	1	71.7	24.8097	5.5	37	4.4	6.34286	0.842716	46.9008	159.891	-35.0343	207.904
HyperGclamp5	27	1	72.4	22.7994	5.6	38	5.4	8	1.76777	30.9207	76.0134	8.74302	32.6274
HyperGclamp6	20	1	63.8	20.0912	5.2	33	5.3	7.02857	1.9636	37.754	132.543	116.255	20.6847
HyperGclamp7	27	1	61.8	22.2658	5.5	37	5.6	7.28571	0.947149	29.8158	70.2273	144.142	32.6274
HyperGclamp8	31	1	78.7	25.4936	5.6	38	5.7	6.65714	1.18188	59.0304	185.762	343.496	519.162
HyperGclamp9	23	1	58.8	19.2881	5.6	38	3.6	5.65714	2.24922	24.8105	78.7942	8.74302	156.095
HyperGclamp10	20	1	75.2	26.4233	4.5	26	5.9	6.71429	0.562926	23.9789	36.0534	-19.1169	48.5525

## Sheet: Pancreatic clamp
ID	Age (years)	Sex (1=M, 2=F)	Weight (kg)	BMI (kg/m2)	HbA1c (%)	HbA1c (mmol/mol)	Fasting glucose (mM)	Euglycemic Glucose (mM)	Euglycemic Glucose CV (%)	Hyperglycemic Glucose (mM)	Hyperglycemic Glucose CV (%)	Fasting insulin (pM)	Euglycemic Insulin (pM)	Hyperglycemic Insulin (pM)	Fasting FGF21 (pg/mL)	Euglycemic FGF21 (pg/mL)	Hyperglycemic FGF21 (pg/mL)
PancClamp01	21.9	1	60.6	18.498	5.3	35	4.8	5.25714	2.15686	10.4286	4.3138	74	72.6	90.8
PancClamp02	18.5	1	69.1	21.092	5.2	33	5.2	5.52857	3.25486	10.3714	2.76742	75	121.2	136.5	460.394	372.436	397.664
PancClamp03	20.8	1	66.3	20.216	5.4	36	5.3	5.5	1.04973	10.9	1.67499	92	73.5	85.4	483.014	988.284	1207.72
PancClamp04	22.8	1	60.2	19.77	5.1	32	5.2	3.81429	2.80274	9.74286	2.04053	36	70.4	79.8	117.538	96.404	158.32
PancClamp05	24.9	1	72.9	21.532	5.4	35	5.4	6.02857	1.25391	11.1	1.56041	43	74.8	114	73.224	114.064	194.598
PancClamp06	20.1	1	73.5	21.71	5	31	4.7	5.22857	3.77933	11.2714	10.3808	51	52.1	96.3	375.578	628.27	967.442
PancClamp07	24.3	1	70.5	21.759	5	31	4.6	4.71429	1.46378	9.9	4.66546	45	59.5	69.4	72.286	88.192	97.862
PancClamp08	20.7	1	68.2	20.703	5.6	38	5.7	5.92857	1.27506	10.6	1.96384	51	64.9	77.8	73.694	97.132	140.412
PancClamp09	23.3	1	77.1	23.276	5.3	35	4.9	4.92857	2.80027	10.4857	1.69069	35	92.8	109.5	199.624	195.39	351.946
PancClamp10	23.1	1	81.1	23.696	5.4	36	5.8	4.92857	1.53377	10.4	1.11029	28	87	94	91.562	112.084	141.936
